# Supplementary material
Source: ML conference proceedings conference paper supplement (https://proceedings.mlr.press/v108/paty20a.html)
Supplement: Supplementary file [file paty20a-supp.pdf]

## A PROOFS

**Proof for Definition 1** We write a proof in the case where  $\mathcal{E} = \{\mathbb{R}^d\}$ . If  $K > 1$ , the proof can be applied independently on each set of the partition.

Let  $(f_n)_{n \in \mathbb{N}}$  be such that  $f_n(0) = 0$  for all  $n \in \mathbb{N}$  and

$$W_2[(\nabla f_n)_\# \mu, \nu] \leq \frac{1}{n+1} + \inf_{f \in \mathcal{F}_{\ell, L}} W_2[(\nabla f)_\# \mu, \nu].$$

Let  $x_0 \in \text{supp}(\mu)$ . Then there exists  $C > 0$  such that for all  $n \in \mathbb{N}$ ,  $\|\nabla f_n(x_0)\| \leq C$ . Indeed, suppose this is not true. Take  $r > 0$  such that  $V := \mu[B(x_0, r)] > 0$ . By Prokhorov theorem, there exists  $R > 0$  such that  $\nu[B(0, R)] \geq 1 - \frac{V}{2}$ . Then for  $C > 0$  large enough, there exists an  $n \in \mathbb{N}$  such that:

$$\begin{aligned} W_2^2[(\nabla f_n)_\# \mu, \nu] &= \min_{\pi \in \Pi(\mu, \nu)} \int \|\nabla f_n(x) - y\|^2 d\pi(x, y) \\ &\geq \int \|\nabla f_n(x) - \text{proj}_{B(0, R)}[\nabla f_n(x)]\|^2 d\mu(x) \\ &\geq \int_{B(x_0, r) \cap \text{supp}(\mu)} \|\nabla f_n - \text{proj}_{B(0, R)}[\nabla f_n]\|^2 d\mu \\ &\geq \frac{1}{2} V \min_{\substack{x \in B(x_0, r) \\ y \in B(0, R)}} \|\nabla f_n(x) - y\|^2 \\ &\geq \frac{1}{2} V (C - Lr - R) \end{aligned}$$

which contradicts the definition of  $f_n$  when  $C$  is sufficiently large.

Then for  $x \in \mathbb{R}^d$ ,

$$\|\nabla f_n(x)\| \leq L\|x - x_0\| + \|\nabla f_n(x_0)\| \leq L\|x - x_0\| + C.$$

Since  $(\nabla f_n)_{n \in \mathbb{N}}$  is equi-Lipschitz, it converges uniformly (up to a subsequence) to some function  $g$  by Arzelà–Ascoli theorem. Note that  $g$  is  $L$ -Lipschitz.

Let  $\epsilon > 0$  and let  $N \in \mathbb{N}$  such that  $n \geq N \Rightarrow \|\nabla f_n - g\|_\infty \leq \epsilon$ . Then for  $n \geq N$  and  $x \in \mathbb{R}^d$ ,

$$|f_n(x)| = \left| \int_0^1 \langle \nabla f_n(tx), x \rangle dt \right| \leq \|x\|(\|g\|_\infty + \epsilon)$$

so that  $(f_n(x))$  converges up to a subsequence. Let  $\phi, \psi$  be two extractions and  $\alpha, \beta$  such that  $f_{\phi(n)}(x) \rightarrow \alpha$  and  $f_{\psi(n)}(x) \rightarrow \beta$ . Then

$$\begin{aligned} |\alpha - \beta| &= \lim_{n \rightarrow \infty} \left| \int_0^1 \langle \nabla f_{\phi(n)}(tx) - \nabla f_{\psi(n)}(tx), x \rangle dt \right| \\ &\leq \lim_{n \rightarrow \infty} \|x\| \|\nabla f_{\phi(n)} - \nabla f_{\psi(n)}\|_\infty = 0. \end{aligned}$$

This shows that  $(f_n)_{n \in \mathbb{N}}$  converges pointwise to some function  $f_*$ . In particular,  $f_*$  is convex. For  $x \in \mathbb{R}^d$ , using Lebesgue's dominated convergence theorem,

$$\begin{aligned} f_*(x) &= \lim_{n \rightarrow \infty} f_n(x) = \lim_{n \rightarrow \infty} \int_0^1 \langle \nabla f_n(tx), x \rangle dt \\ &= \int_0^1 \left\langle \lim_{n \rightarrow \infty} \nabla f_n(tx), x \right\rangle dt = \int_0^1 \langle g(tx), x \rangle dt \end{aligned}$$

so  $f_*$  is differentiable and  $\nabla f_* = g$ . Using Lebesgue's dominated convergence theorem, uniform (hence pointwise) convergence of  $(\nabla f_n)_{n \in \mathbb{N}}$  to  $\nabla f_*$  shows that  $(\nabla f_n)_\# \mu \rightarrow (\nabla f_*)_\# \mu$ . Then classical optimal transport stability theorems *e.g.* (Villani, 2009, Theorem 5.19) show that

$$\begin{aligned} W_2[(\nabla f_*)_\# \mu, \nu] &= \lim_{n \rightarrow \infty} W_2[(\nabla f_n)_\# \mu, \nu] \\ &= \inf_{f \in \mathcal{F}_{\ell, L}} W_2[(\nabla f)_\# \mu, \nu], \end{aligned}$$

*i.e.*  $f_*$  is a minimizer.

**Proof of Theorem 1** For  $f \in \mathcal{F}_{\ell, L, \mathcal{E}}$ ,  $\nabla f_\# \mu = \sum_{i=1}^n a_i \delta_{\nabla f(x_i)}$ . Writing  $z_i = \nabla f(x_i)$ , we wish to minimize  $W_2^2(\sum_{i=1}^n a_i \delta_{z_i}, \nu)$  over all the points  $z_1, \dots, z_n \in \mathbb{R}^d$  such that there exists  $f \in \mathcal{F}_{\ell, L, \mathcal{E}}$  with  $\nabla f(x_i) = z_i$  for all  $i \in \llbracket n \rrbracket$ . Following (Taylor, 2017, Theorem 3.8), there exists such a  $f$  if, and only if, there exists  $u \in \mathbb{R}^n$  such that for all  $k \in \llbracket K \rrbracket$  and for all  $i, j \in I_k$ ,

$$\begin{aligned} u_i &\geq u_j + \langle z_j, x_i - x_j \rangle + \frac{1}{2(1 - \ell/L)} \left( \frac{1}{L} \|z_i - z_j\|^2 \right. \\ &\quad \left. + \ell \|x_i - x_j\|^2 - 2 \frac{\ell}{L} \langle z_j - z_i, x_j - x_i \rangle \right). \end{aligned}$$

Then minimizing over  $f \in \mathcal{F}_{\ell, L, \mathcal{E}}$  is equivalent to minimizing over  $(z_1, \dots, z_n, u)$  under these interpolation constraints.

The second part of the theorem is a direct application of (Taylor, 2017, Theorem 3.14).

**Proof of Proposition 1** Let  $f : \mathbb{R} \rightarrow \mathbb{R}$ . Then  $f \in \mathcal{F}_{\ell, L, \mathcal{E}}$  if and only if it is convex and  $L$ -smooth on each set  $E_k$ ,  $k \in \llbracket K \rrbracket$ , *i.e.* if and only if for any  $k \in \llbracket K \rrbracket$ ,  $0 \leq f''|_{E_k} \leq L$ .

For a measure  $\rho$ , let us write  $F_\rho$  and  $Q_\rho$  the cumulative distribution function and the quantile function (*i.e.* the generalized inverse of the cumulative distribution function). Then  $Q_{\nabla f_\# \mu} = \nabla f \circ Q_\mu$ .

Using the closed-form formula for the Wasserstein distance in dimension 1, the objective we wish to minimize (over  $f \in \mathcal{F}_{\ell, L, \mathcal{E}}$ ) is:

$$W_2^2(f'_\# \mu, \nu) = \int_0^1 [f' \circ Q_\mu(t) - Q_\nu(t)]^2 dt.$$

Suppose  $\mu$  has a density w.r.t the Lebesgue measure. Then by a change of variable, the objective becomes

$$\int_{-\infty}^{+\infty} [f'(x) - Q_\nu \circ F_\mu(x)]^2 d\mu(x) = \|f' - \bar{\pi}\|_{L^2(\mu)}^2.$$

Indeed,  $Q_\nu \circ F_\mu$  is the optimal transport map from  $\mu$  to  $\nu$ , hence its own barycentric projection. The result

follows.

Suppose now that  $\mu$  is purely atomic, and write  $\mu = \sum_{i=1}^n a_i \delta_{x_i}$  with  $x_1 \leq \dots \leq x_n$ . For  $0 \leq i \leq n$ , put  $\alpha_i = \sum_{k=1}^i a_k$  with  $\alpha_0 = 0$ . Then

$$\begin{aligned} W_2^2(f'_\# \mu, \nu) &= \sum_{i=1}^n \int_{\alpha_{i-1}}^{\alpha_i} (f'(x_i) - Q_\nu(t))^2 dt \\ &= \sum_{i=1}^n a_i \left[ f'(x_i) - \frac{1}{a_i} \left( \int_{\alpha_{i-1}}^{\alpha_i} Q_\nu(t) dt \right) \right]^2 \\ &\quad + \int_{\alpha_{i-1}}^{\alpha_i} Q_\nu(t)^2 dt - \frac{1}{a_i} \left( \int_{\alpha_{i-1}}^{\alpha_i} Q_\nu(t) dt \right)^2. \end{aligned}$$

Since  $\sum_{i=1}^n \int_{\alpha_{i-1}}^{\alpha_i} Q_\nu(t)^2 dt - \frac{1}{a_i} \left( \int_{\alpha_{i-1}}^{\alpha_i} Q_\nu(t) dt \right)^2$  does not depend on  $f$ , minimizing  $W_2^2(f'_\# \mu, \nu)$  over  $f \in \mathcal{F}_{\ell, L, \varepsilon}$  is equivalent to solve

$$\min_{f \in \mathcal{F}_{\ell, L, \varepsilon}} \sum_{i=1}^n a_i \left[ f'(x_i) - \frac{1}{a_i} \left( \int_{\alpha_{i-1}}^{\alpha_i} Q_\nu(t) dt \right) \right]^2.$$

There only remains to show that  $\bar{\pi}(x_i) = \frac{1}{a_i} \int_{\alpha_{i-1}}^{\alpha_i} Q_\nu(t) dt$ . Using the definition of the conditional expectation and the definition of  $\pi$ :

$$\begin{aligned} \bar{\pi}(x_i) &= \frac{1}{a_i} \int_{-\infty}^{+\infty} y \mathbf{1}\{x = x_i\} d\pi(x, y) \\ &= \frac{1}{a_i} \int_{-\infty}^{+\infty} y \mathbf{1}\{x = x_i\} d(Q_\mu, Q_\nu)_\# \mathcal{L}^1|_{[0,1]} \\ &= \frac{1}{a_i} \int_0^1 Q_\nu(t) \mathbf{1}\{Q_\mu(t) = x_i\} dt \\ &= \frac{1}{a_i} \int_{\alpha_{i-1}}^{\alpha_i} Q_\nu(t) dt. \end{aligned}$$

**Proof of Proposition 2** Since  $\mathcal{E} = \{\mathbb{R}^d\}$ , and using the triangular inequality for the Wasserstein distance,

$$\begin{aligned} \left| W_2(\mu, \nu) - \widehat{W}_2(\mu, \nu) \right| &= \left| W_2(\mu, \nu) - W_2(\mu, \nabla \hat{f}_n \# \mu) \right| \\ &\leq W_2(\nabla \hat{f}_n \# \mu, \nu) \\ &\leq W_2(\nabla \hat{f}_n \# \mu, \nabla \hat{f}_n \# \hat{\mu}_n) \quad (4) \\ &\quad + W_2(\nabla \hat{f}_n \# \hat{\mu}_n, \hat{\nu}_n) \quad (5) \\ &\quad + W_2(\hat{\nu}_n, \nu). \quad (6) \end{aligned}$$

We now successively upper bound terms (4), (5), (6).

Since  $\nabla \hat{f}_n$  is  $L$ -Lispchitz, almost surely:

$$(4) = W_2(\nabla \hat{f}_n \# \mu, \nabla \hat{f}_n \# \hat{\mu}_n) \leq L W_2(\mu, \hat{\mu}_n) \xrightarrow{n \rightarrow \infty} 0$$

since almost surely,  $\hat{\mu}_n \rightarrow \mu$  and  $\mu$  has compact support, cf. (Santambrogio, 2015, Theorem 5.10). For the same reason, almost surely:

$$(6) = W_2(\hat{\nu}_n, \nu) \xrightarrow{n \rightarrow \infty} 0.$$

Finally, since  $f_\star \in \mathcal{F}_{\ell, L, \varepsilon}$  and  $\nabla \hat{f}_n$  is an optimal SSNB potential, it almost surely holds:

$$(5) = W_2(\nabla \hat{f}_n \# \hat{\mu}_n, \hat{\nu}_n) \leq W_2(\nabla f_\star \# \hat{\mu}_n, \hat{\nu}_n) \xrightarrow{n \rightarrow \infty} W_2(\nabla f_\star \# \mu, \nu) = 0$$

because  $(\hat{\mu}_n, \hat{\nu}_n) \rightarrow (\mu, \nu)$ , and by definition of  $f_\star$ ,  $\nabla f_\star \# \mu = \nu$ .
